# Supplementary material for: Homozygous loss-of-function mutations in MNS1 cause laterality defects and likely male infertility
Source: PubMed Central journal article supplement (PMC6128653; doi:10.1371/journal.pgen.1007602), 2018-08-27
Supplement: pgen.1007602.s001.pdf [file pgen.1007602.s001.pdf]

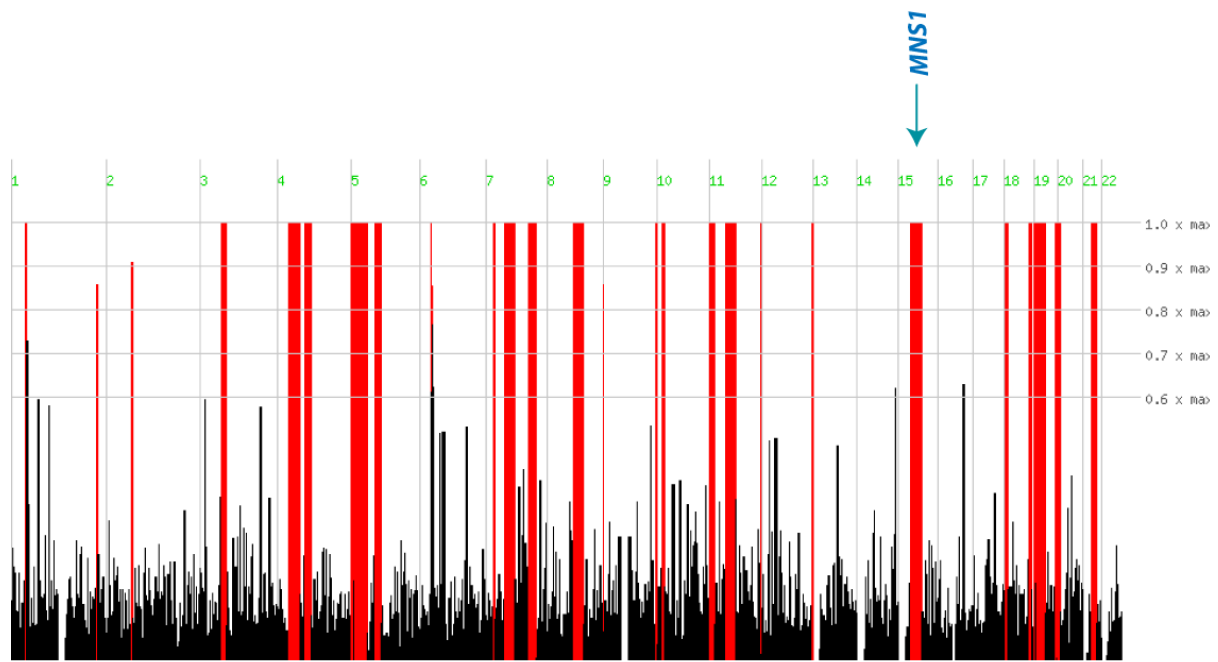

**S1 Fig. Linkage analysis in individual OI-11 II6.** Genome-wide homozygosity is displayed as bar charts. Candidate regions of homozygosity by descent with scores higher than 80% of the maximum score are displayed as red bars. *MNS1* is positioned within one of the maximum score peaks (arrow).
