# Supplementary material for: Homozygous loss-of-function mutations in MNS1 cause laterality defects and likely male infertility
Source: PubMed Central journal article supplement (PMC6128653; doi:10.1371/journal.pgen.1007602), 2018-08-27
Supplement: pgen.1007602.s002.pdf [file pgen.1007602.s002.pdf]

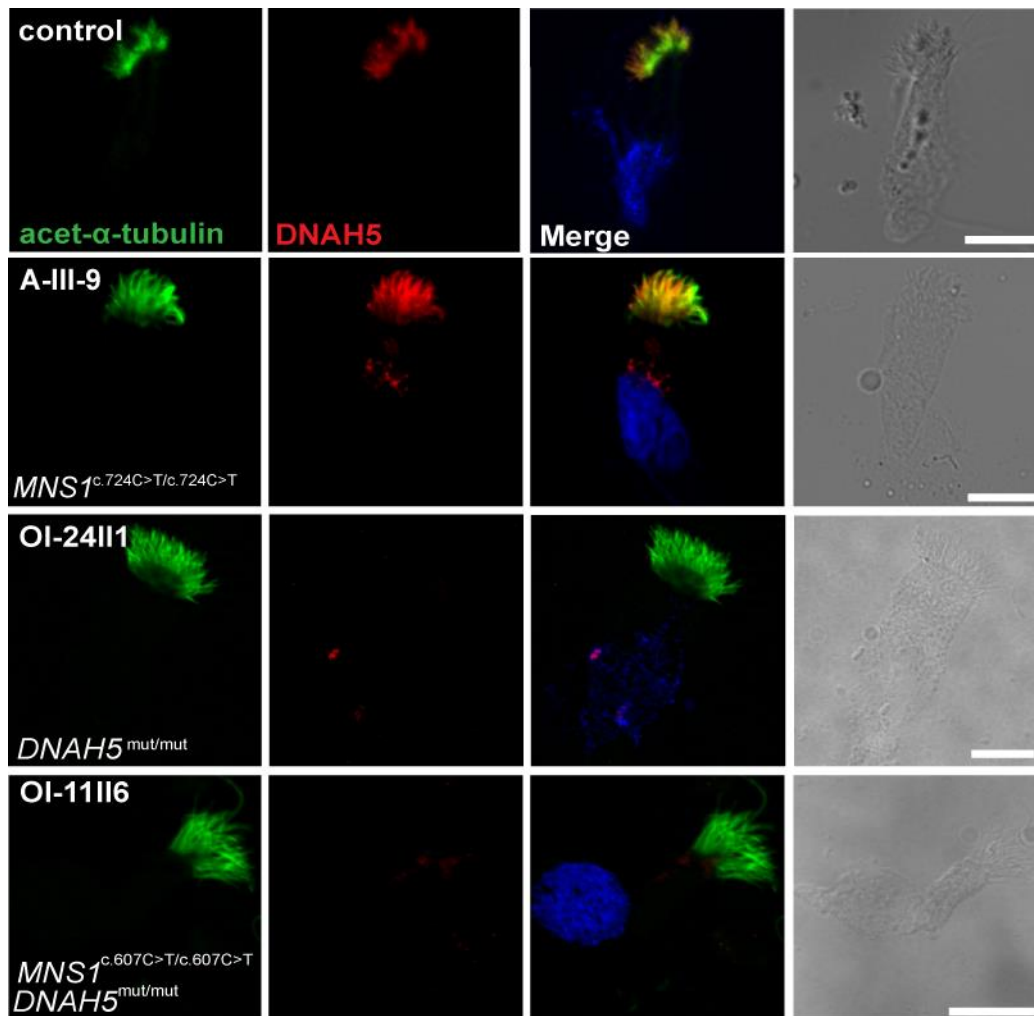

**S2 Fig. DNAH5 localizes normally to the axonemes with MNS1 deficiency.**

Respiratory epithelial cells from control and affected individuals: AL-III-9 carrying bi-allelic *MNS1* mutations, OI-11 II6 carrying bi-allelic *MNS1* and *DNAH5* mutations and OI-24 II1 carrying no mutations in *MNS1* but identical bi-allelic *DNAH5* mutations as OI-11 II6. For space issues, OI-24 II1 is described as *DNAH5*<sup>mut/mut</sup> instead of *DNAH5*<sup>c.13432\_13435delCACT/ c.13432\_13435delCACT</sup>. Cells were double-labeled with antibodies directed against acetylated alpha-tubulin (green) and DNAH5 (red). Nuclei were stained with Hoechst 33342 (blue). Both proteins co-localize (yellow) along the ciliary axonemes in cells from the unaffected controls and cells from AL-III-9, while in respiratory cells of OI-11 II6 and OI-24 II1, DNAH5 is undetectable consistent with a defect of the outer dynein arms.
