# Supplementary material for: Homozygous loss-of-function mutations in MNS1 cause laterality defects and likely male infertility
Source: PubMed Central journal article supplement (PMC6128653; doi:10.1371/journal.pgen.1007602), 2018-08-27
Supplement: pgen.1007602.s005.pdf [file pgen.1007602.s005.pdf]

**S1 Table. Filtering process for gene variants identified through whole exome sequencing**

|                                                                                                                                       | MS-II-1                                                                                                                                                                                                            | AL-IV-3                                   | BG-II-1                                                                                                                                         |
|---------------------------------------------------------------------------------------------------------------------------------------|--------------------------------------------------------------------------------------------------------------------------------------------------------------------------------------------------------------------|-------------------------------------------|-------------------------------------------------------------------------------------------------------------------------------------------------|
| Total number of homozygous coding variants or within 20 bp of intron-exon boundaries with MAF <0.5% in Exac, 1000 genomes and eps6500 | 44 variants (see Table S4 for details)                                                                                                                                                                             | 26 variants (see Table S2 for details)    | 23 variants (see Table S3 for details)                                                                                                          |
| Of which stop, frameshift or consensus splice variants                                                                                | AGAP3: rs766984834, c.94_95insGGGG:p.C32fs<br>MNS1: rs185005213, MNS1:NM_018365:c.C724T:p.R242X<br>MST1L: rs200532237, NM_001271733:c.811dupG:p.A271fs<br>SLAIN1: rs201380414, NM_001242868:c.219_220insGG:p.A73fs | MNS1: rs185005213, MNS1:NM_018365:p.R242X | MNS1: rs185005213, MNS1:NM_018365:p.R242X<br>MYO3A:NM_017433:p.T26fs<br>VEZF1:NM_007146:p.Q349QQQ<br>UBXN11: NM_001077262.1:p.GPGP<br>SPCPG506G |
| Of which (associated with left-right body axis establishment in the literature) segregated with the phenotype in the family           | MNS1: rs185005213, MNS1:NM_018365:c.C724T:p.R242X                                                                                                                                                                  | MNS1: rs185005213, MNS1:NM_018365:p.R242X | MNS1: rs185005213, MNS1:NM_018365:p.R242X                                                                                                       |

MAF: Minor allele frequency
