# Supplementary material for: Homozygous loss-of-function mutations in MNS1 cause laterality defects and likely male infertility
Source: PubMed Central journal article supplement (PMC6128653; doi:10.1371/journal.pgen.1007602), 2018-08-27
Supplement: pgen.1007602.s006.pdf [file pgen.1007602.s006.pdf]

**S2 Table. List of homozygous variants left after filtering in individual AL-IV-3**

| >chromoso | chrStart | refSeq | varSeq | varType  | rsidList    | genesList | protImpactList | aaChange | globalAlleleFreq |
|-----------|----------|--------|--------|----------|-------------|-----------|----------------|----------|------------------|
| 12        | 475269   | A      | T      | SNP (x2) |             | KDM5A     | MISSENSE       | I-123-N  | 0                |
| 11        | 65307193 | G      | A      | SNP (x2) |             | LTBP3     | MISSENSE       | A-1182-V | 0                |
| 3         | 1418745  | G      | A      | SNP (x2) | rs140014929 | CNTN6     | MISSENSE       | V-718-I  | 0,01             |
| 8         | 98991129 | C      | T      | SNP (x2) | rs146982976 | MATN2     | MISSENSE       | A-325-V  | 0,26             |
| 14        | 20849189 | G      | C      | SNP (x2) | rs144150517 | TEP1      | MISSENSE       | R-1555-G | 0,17             |
| 3         | 50614965 | G      | A      | SNP (x2) | rs2232250   | HEMK1     | MISSENSE       | R-192-Q  | 0,33             |
| 8         | 99042725 | A      | C      | SNP (x2) |             | MATN2     | MISSENSE       | I-798-L  | 0                |
| 3         | 1,68E+08 | G      | A      | SNP (x2) | rs61750375  | SERPINI1  | MISSENSE       | V-97-I   | 0,46             |
| 1         | 2,47E+08 | G      | A      | SNP (x2) | rs567370905 | CNST      | MISSENSE       | S-113-N  | 0,12             |
| 1         | 2,03E+08 | C      | T      | SNP (x2) |             | PPFIA4    | MISSENSE       | P-528-L  | 0                |
| 1         | 10529326 | A      | G      | SNP (x2) | rs138842024 | DFFA      | MISSENSE       | I-69-T   | 0,34             |
| 12        | 863309   | C      | A      | SNP (x2) | rs72647372  | WNK1      | MISSENSE       | P-193-Q  | 0,05             |
| 22        | 38318211 | G      | C      | SNP (x2) |             | MICALL1   | MISSENSE       | D-268-H  | 0                |
| 1         | 10714097 | C      | T      | SNP (x2) | rs143974084 | CASZ1     | MISSENSE       | A-673-T  | 0,01             |
| 3         | 50329885 | A      | T      | SNP (x2) | rs200409823 | IFRD2     | MISSENSE       | S-5-T    | 0,03             |
| 1         | 12337667 | C      | T      | SNP (x2) | rs12407578  | VPS13D    | MISSENSE       | S-1341-L | 0,27             |
| 3         | 48310010 | G      | A      | SNP (x2) |             | ZNF589    | MISSENSE       | V-277-I  | 0                |
| 3         | 50379289 | T      | C      | SNP (x2) | rs114329675 | ZMYND10   | MISSENSE       | Q-358-R  | 0,17             |
| 3         | 44285446 | A      | G      | SNP (x2) | rs17076541  | TOPAZ1    | MISSENSE       | Q-483-R  | 0,35             |
| 12        | 5154242  | C      | T      | SNP (x2) | rs17215402  | KCNA5     | MISSENSE       | P-310-L  | 0,37             |
| 12        | 1023269  | G      | C      | SNP (x2) |             | RAD52     | MISSENSE       | S-329-C  | 0                |
| 11        | 63992155 | G      | A      | SNP (x2) | rs143200811 | TRPT1     | MISSENSE       | P-123-L  | 0,03             |
| 12        | 51740410 | A      | G      | SNP (x2) | rs116944010 | CELA1     | MISSENSE       | Y-5-H    | 0,02             |
| 12        | 51740409 | T      | G      | SNP (x2) | rs117443541 | CELA1     | MISSENSE       | Y-5-S    | 0,02             |
| 11        | 62294549 | T      | G      | SNP (x2) | rs200444167 | AHNAK     | MISSENSE       | H-2447-P | 0,01             |
| 15        | 56736015 | G      | A      | SNP (x2) | rs185005213 | MNS1      | NONSENSE       | R-242-*  | 0,04             |
