# Supplementary material for: Homozygous loss-of-function mutations in MNS1 cause laterality defects and likely male infertility
Source: PubMed Central journal article supplement (PMC6128653; doi:10.1371/journal.pgen.1007602), 2018-08-27
Supplement: pgen.1007602.s007.pdf [file pgen.1007602.s007.pdf]

**S3 Table. List of homozygous variants left after filtering in individual BG-II-1**

| >chromoso | chrStart  | refSeq    | varSeq | varType  | rsidList    | genesList | protImpactList | aaChange        | globalAlleleFreq |
|-----------|-----------|-----------|--------|----------|-------------|-----------|----------------|-----------------|------------------|
| 10        | 26241115  | AC        | TA     | SNP (x2) |             | MYO3A     | NONSENSE       | T-26-X          |                  |
| 17        | 56056605  | -         | TGCTGC | INS (x2) |             | VEZF1     | INSERT+        | Q-349-QQQ       | 0                |
| 1         | 26608812  | CCAGGACA- |        | DEL (x2) |             | UBXN11    | DELETE+        | GPGPSPCPG-506-G | 0                |
| 5         | 40955530  | G         | C      | SNP (x2) | rs121964921 | C7        | MISSENSE       | G-379-R         | 0,01             |
| 18        | 33935547  | G         | A      | SNP (x2) |             | FHOD3     | MISSENSE       | D-71-N          | 0                |
| 15        | 93588394  | T         | A      | SNP (x2) |             | RGMA      | MISSENSE       | Y-404-F         | 0                |
| 10        | 49654502  | T         | C      | SNP (x2) | rs148992704 | ARHGAP22  | MISSENSE       | M-693-V         | 0,01             |
| 17        | 33977795  | A         | G      | SNP (x2) |             | AP2B1     | MISSENSE       | I-595-V         | 0,01             |
| 15        | 44856764  | A         | G      | SNP (x2) | rs150571352 | SPG11     | MISSENSE       | F-2378-L        | 0,02             |
| X         | 69459599  | C         | T      | SNP (x2) | rs141044914 | AWAT1     | MISSENSE       | P-216-L         | 0,05             |
| 17        | 66364750  | G         | A      | SNP (x2) | rs144631983 | ARSG      | MISSENSE       | V-256-M         | 0,03             |
| 8         | 110460501 | T         | A      | SNP (x2) |             | PKHD1L1   | MISSENSE       | V-1969-E        | 0                |
| X         | 30236905  | G         | A      | SNP (x2) | rs183272477 | MAGEB2    | MISSENSE       | A-70-T          | 0,06             |
| X         | 118222854 | G         | A      | SNP (x2) | rs376769242 | KIAA1210  | MISSENSE       | S-780-F         | 0,01             |
| X         | 34149690  | G         | A      | SNP (x2) | rs367563899 | FAM47A    | MISSENSE       | R-236-C         | 0,02             |
| X         | 48780985  | T         | C      | SNP (x2) |             | OTUD5     | MISSENSE       | T-507-A         | 0                |
| 10        | 51585255  | A         | C      | SNP (x2) |             | NCOA4     | MISSENSE       | K-468-Q         | 0                |
| 5         | 35876524  | C         | G      | SNP (x2) | rs148931962 | IL7R      | MISSENSE       | T-439-S         | 0,04             |
| X         | 83128603  | C         | G      | SNP (x2) | rs150275297 | CYLC1     | MISSENSE       | S-296-C         | 0,04             |
| 20        | 1610949   | G         | T      | SNP (x2) |             | SIRPG     | MISSENSE       | P-362-Q         | 0                |
| X         | 54783884  | C         | T      | SNP (x2) |             | ITIH6     | MISSENSE       | E-875-K         | 0,01             |
| 15        | 56736015  | G         | A      | SNP (x2) | rs185005213 | MNS1      | NONSENSE       | R-242-*         | 0,04             |
