# Supplementary material for: Homozygous loss-of-function mutations in MNS1 cause laterality defects and likely male infertility
Source: PubMed Central journal article supplement (PMC6128653; doi:10.1371/journal.pgen.1007602), 2018-08-27
Supplement: pgen.1007602.s008.pdf [file pgen.1007602.s008.pdf]

**S4 Table. Homozygous variants after filtering in individual MS-II-1**

| CHROM | POS       | ID          | REF       | ALT         | GeneName  | Func          | ExonicFunc        | AAChange                    | 1000g2015aug_ | esp6500siv | ExAC_ALL |
|-------|-----------|-------------|-----------|-------------|-----------|---------------|-------------------|-----------------------------|---------------|------------|----------|
| 5     | 7757704   | rs764722596 | G         | GCCCCAGAGC  | ADCY2     | splicing      | .                 | .                           | .             | .          | 8.33E-03 |
| 7     | 150783911 | rs769408537 | A         | G           | AGAP3     | exonic        | missense SNV      | c.A83G:p.Q28R               | .             | .          | 0        |
| 7     | 150783917 | rs775200524 | T         | G           | AGAP3     | exonic        | missense SNV      | c.T89G:p.L30R               | .             | .          | 0        |
| 7     | 150783922 | rs766984834 | T         | TGGGG       | AGAP3     | exonic        | frameshift INS    | c.94_95insGGGG:p.C32fs      | .             | .          | 0        |
| 7     | 150783919 | rs776100575 | GTCT      | G           | AGAP3     | exonic        | nonframeshift DEL | c.92_94del:p.31_32del       | .             | .          | 0        |
| X     | 48925533  | .           | G         | A           | CCDC120   | exonic        | missense SNV      | c.G1883A:p.R628H            | 0.000264901   | .          | 0.0030   |
| 14    | 39784012  | rs554677567 | A         | ATGTGTGTGT  | CTAGE5    | splicing      | .                 | .                           | 0.00479233    | .          | .        |
| 15    | 45401064  | .           | AGCTGGGCA | A           | DUOX2     | exonic        | nonframeshift DEL | c.1300_1320del:p.434_440del | .             | .          | .        |
| 8     | 11666218  | rs71711801  | GTCCAC    | G           | FDFT1     | exonic        | nonframeshift DEL | c.193_198del:p.65_66del     | .             | .          | .        |
| 6     | 32632646  | rs9274387   | G         | T           | HLA-DQB1  | exonic        | missense SNV      | c.C308A:p.T103N             | .             | .          | 0.0036   |
| 19    | 55239223  | .           | G         | A           | KIR3DL3   | exonic        | missense SNV      | c.G502A:p.V168I             | .             | .          | .        |
| 15    | 43621201  | rs774895599 | A         | C           | LCMT2     | exonic        | missense SNV      | c.T1487G:p.F496C            | .             | .          | 1.65E-02 |
| 21    | 35334666  | rs766424    | C         | T           | LINC00649 | exonic        | missense SNV      | c.C377T:p.S126F             | .             | .          | .        |
| 3     | 100170600 | rs71132521  | A         | ATCCTAGAAG  | LNP1      | exonic        | nonframeshift INS | <sup>1</sup> see below      | .             | .          | .        |
| 15    | 56736015  | rs185005213 | G         | A           | MNS1      | exonic        | stopgain          | c.C724T:p.R242X             | 0.000399361   | 7.7e-05    | 0.0004   |
| 1     | 17086085  | rs200532237 | G         | GC          | MST1L     | exonic        | frameshift INS    | c.811dupG:p.A271fs          | .             | .          | 0.0010   |
| X     | 153421854 | .           | A         | T           | OPN1LW    | exonic        | missense SNV      | c.A830T:p.Y277F             | .             | .          | .        |
| X     | 153421859 | .           | G         | T           | OPN1LW    | exonic        | missense SNV      | c.G835T:p.V279F             | .             | 0.0002     | 1.15E-02 |
| X     | 153421844 | .           | A         | G           | OPN1LW    | exonic        | missense SNV      | c.A820G:p.I274V             | .             | .          | .        |
| X     | 153421847 | .           | T         | C           | OPN1LW    | exonic        | missense SNV      | c.T823C:p.F275L             | .             | .          | .        |
| X     | 153421849 | .           | T         | G           | OPN1LW    | exonic        | missense SNV      | c.T825G:p.F275L             | .             | .          | 1.15E-02 |
| X     | 153496198 | .           | T         | A           | OPN1MW2   | exonic        | missense SNV      | c.T926A:p.F309Y             | .             | .          | 0.0001   |
| X     | 153496164 | .           | C         | G           | OPN1MW2   | exonic        | missense SNV      | c.C892G:p.P298A             | 0.0015894     | .          | 0.0003   |
| X     | 153496125 | .           | G         | A           | OPN1MW2   | exonic        | missense SNV      | c.G853A:p.A285T             | .             | .          | 0.0005   |
| 3     | 16926607  | rs7626448   | T         | C           | PLCL2     | exonic        | unknown           | UNKNOWN                     | .             | .          | 0        |
| 3     | 16926544  | rs368284573 | T         | G           | PLCL2     | exonic;splici | unknown           | UNKNOWN                     | .             | .          | 0        |
| X     | 153036027 | .           | C         | T           | PLXNB3    | exonic        | missense SNV      | c.C1940T:p.P647L            | .             | .          | 6.37E-02 |
| 21    | 14982886  | rs142207431 | G         | A           | POTED     | exonic        | missense SNV      | c.G337A:p.G113S             | .             | .          | .        |
| 21    | 14982952  | rs117112505 | A         | G           | POTED     | exonic        | missense SNV      | c.A403G:p.I135V             | .             | .          | .        |
| 21    | 15013735  | rs78643169  | A         | G           | POTED     | exonic        | missense SNV      | c.A1603G:p.M535V            | .             | .          | .        |
| 1     | 33430102  | rs113840389 | T         | G           | RNF19B    | exonic        | missense SNV      | c.A185C:p.Q62P              | .             | .          | .        |
| 8     | 10467637  | rs369606728 | T         | TCCTCTAACTG | RP1L1     | exonic        | nonframeshift INS | <sup>2</sup> see below      | .             | .          | .        |
| 13    | 78272267  | rs201380414 | T         | TGG         | SLAIN1    | exonic        | frameshift INS    | c.219_220insGG:p.A73fs      | .             | .          | 0        |
| 3     | 14444329  | rs67559364  | CT        | C           | SLC6A6    | splicing      | .                 | .                           | .             | .          | .        |
| 15    | 51041909  | rs145832874 | C         | T           | SPPL2A    | exonic        | missense SNV      | c.G101A:p.G34E              | 0.00259585    | 0.0011     | 0.0019   |
| 3     | 12046256  | rs782385358 | G         | CCCCCCCC    | SYN2      | exonic        | unknown           | UNKNOWN                     | .             | .          | 0        |
| 3     | 12046268  | rs782162668 | G         | GCGCGA      | SYN2      | exonic        | unknown           | UNKNOWN                     | .             | .          | 0        |
| 3     | 12046222  | rs71624921  | A         | C           | SYN2      | exonic        | unknown           | UNKNOWN                     | .             | .          | 0        |
| 3     | 12046215  | rs2623876   | G         | C           | SYN2      | exonic        | unknown           | UNKNOWN                     | .             | .          | 0        |
| 2     | 46707808  | rs70940616  | C         | CAGCGGCAGC  | TMEM247   | exonic        | nonframeshift INS | <sup>3</sup> see below      | .             | .          | .        |
| 3     | 42251577  | rs10634555  | C         | CGGA        | TRAK1     | exonic        | nonframeshift INS | <sup>4</sup> see below      | .             | .          | .        |
| 14    | 38183928  | rs78042024  | G         | A           | TTC6      | exonic        | missense SNV      | c.G1688A:p.G563E            | 0.00439297    | .          | 0.0028   |
| 4     | 9236859   | rs776377841 | A         | T           | USP17L15  | exonic        | missense SNV      | c.A749T:p.N250I             | .             | .          | 0        |

<sup>1</sup>c.194\_195insTCCTAGAAGGCATTCTCATGAGGACCAGGAATCCGATGCCGATCGTCTGACCGTCT:p.H65delinsHPRRSHEDQEFRCRSDRL

<sup>2</sup>c.3970\_3971insGGACTAAAGTAATAGAAGGGCTGCAAGAAGAGAGGGTGCAGTTAGAGG:p.E1324delinsGTKVIEGLQEERVQLEE

<sup>3</sup>c.382\_383insAGCGGCAGCACGAGGTGGTGTGGAGCAGCTGCAGCGGG:p.Q128delinsQRQHEVVMEQLQRE

<sup>4</sup>c.1841\_1842insGGA:p.T614delinsTE
