# Supplementary material for: Homozygous loss-of-function mutations in MNS1 cause laterality defects and likely male infertility
Source: PubMed Central journal article supplement (PMC6128653; doi:10.1371/journal.pgen.1007602), 2018-08-27
Supplement: pgen.1007602.s009.pdf [file pgen.1007602.s009.pdf]

**S5 Table. Spermogram data**

| Individual | Volume<br>(≥ 1.5 ml) | Color <sup>1</sup> | Viscosity <sup>2</sup> | Concentration<br>(≥ 15 x 10 <sup>6</sup> cells/ ml) | Motility <sup>3</sup><br>(≥ 32% progressive motile (PR) sperm cells*) | Morphology<br>(≥ 4% normal formed sperm cells*) |
|------------|----------------------|--------------------|------------------------|-----------------------------------------------------|-----------------------------------------------------------------------|-------------------------------------------------|
| A-III-9    | 3 ml                 | normal             | normal                 | 22 x 10 <sup>6</sup> cells/ ml                      | PR: 07%                                                               | < 1%                                            |
|            |                      |                    |                        |                                                     | NP: 05%                                                               |                                                 |
|            |                      |                    |                        |                                                     | IM: 88%                                                               |                                                 |
| B-II-1     | 3 ml                 | creamy             | normal                 | 80 x 10 <sup>6</sup> cells/ ml                      | PR: 20%                                                               | 10%                                             |
|            |                      |                    |                        |                                                     | NP: N.A.                                                              |                                                 |
|            |                      |                    |                        |                                                     | IM: N.A.                                                              |                                                 |

n.a.: not available

**Reference:** WHO laboratory manual for the examination and processing of human semen. 5th ed. World Health Organization, Geneva, 2010.

---

<sup>1</sup> According to latest WHO guidelines (2010) a normal liquefied semen sample has a homogeneous, grey-opalescent appearance. It may appear less opaque if the sperm concentration is very low; the colour may also be different, i.e. red-brown when red blood cells are present (haemospermia), or yellow in a man with jaundice or taking certain vitamins or drugs.

<sup>2</sup> A semen sample with normal viscosity leaves the pipette in small discrete drops. If viscosity is abnormal, the drop will form a thread more than 2 cm long.

<sup>3</sup> Sperm motility according to latest WHO guidelines (2010) is assessed by categorizing sperm cells in the analyzed ejaculate in progressive motile (PR), non-progressive motile (NP) and immotile sperm cells. The respective percentages have to be determined.

\*32% for motility and 4% for morphology are the lower limits for normality.
